# Supplementary material for: Short-Interval, Severe Wildfires Alter Saproxylic Beetle Diversity in Andean Araucaria Forests in Northwest Chilean Patagonia
Source: MDPI journal article supplement (doi:10.3390/f13030441), 2022-03-11
Supplement: s1 [file s1]

**Supplementary Material S2.** Species list and abundances of saproxylic beetles registered in: 2002 burned areas (2002); 2015 burned areas (2015); short-interval severe burned areas (i.e. 2002 and 2015 fires, SISF), and unburned areas in Northwest Patagonian *Araucaria-Nothofagus* Chilean forests.

| Family and species/ Fire conditions                       | Code | 2002      | 2015     | SISF     | Unburned  | Total     |
|-----------------------------------------------------------|------|-----------|----------|----------|-----------|-----------|
| <b>Aderidae</b>                                           |      | <b>3</b>  | <b>0</b> | <b>0</b> | <b>2</b>  | <b>5</b>  |
| Aderidae gen indet                                        | ZO   | 0         | 0        | 0        | 1         | 1         |
| Aderidae gen indet 2                                      | ZO   | 0         | 0        | 0        | 1         | 1         |
| <i>Dasytomorphus ruficollis</i> Fairmaire & Germain, 1863 | ZO   | 3         | 0        | 0        | 0         | 3         |
| <b>Anthicidae</b>                                         |      | <b>2</b>  | <b>0</b> | <b>0</b> | <b>16</b> | <b>18</b> |
| <i>Acanthius</i> sp                                       | ZO   | 1         | 0        | 0        | 0         | 1         |
| <i>Copobaenus nobilis</i> Fairmaire & Germain, 1863       | ZO   | 1         | 0        | 0        | 9         | 10        |
| <i>Copobaenus tristis</i> Fairmaire & Germain, 1863       | ZO   | 0         | 0        | 0        | 7         | 7         |
| <b>Biphyllidae</b>                                        |      | <b>43</b> | <b>0</b> | <b>7</b> | <b>8</b>  | <b>58</b> |
| Biphyllidae gen sp 1                                      | MC   | 37        | 0        | 7        | 3         | 47        |
| <i>Diplocoelus</i> sp                                     | MC   | 6         | 0        | 0        | 5         | 11        |
| <b>Buprestidae</b>                                        |      | <b>0</b>  | <b>1</b> | <b>0</b> | <b>2</b>  | <b>3</b>  |
| <i>Epistomentis pictus pictus</i> (Gory, 1841)            | XL   | 0         | 1        | 0        | 2         | 3         |
| <b>Cantharidae</b>                                        |      | <b>3</b>  | <b>2</b> | <b>0</b> | <b>35</b> | <b>40</b> |
| Cantharidae sp 1                                          | MC   | 2         | 0        | 0        | 4         | 6         |
| <i>Chauliognathus</i> sp                                  | MC   | 0         | 2        | 0        | 5         | 7         |
| <i>Hyponotum grandicolle</i> (Pic, 1928)                  | MC   | 1         | 0        | 0        | 26        | 27        |
| <b>Carabidae</b>                                          |      | <b>4</b>  | <b>1</b> | <b>0</b> | <b>9</b>  | <b>14</b> |
| Carabidae sp 1                                            | ZO   | 0         | 1        | 0        | 0         | 1         |
| Carabidae sp 2                                            | ZO   | 0         | 0        | 0        | 1         | 1         |
| Carabidae sp 4                                            | ZO   | 3         | 0        | 0        | 1         | 4         |
| Carabidae sp 5                                            | ZO   | 0         | 0        | 0        | 1         | 1         |
| Carabidae sp 6                                            | ZO   | 0         | 0        | 0        | 1         | 1         |
| Carabidae sp 7                                            | ZO   | 0         | 0        | 0        | 1         | 1         |
| Carabidae sp 8                                            | ZO   | 0         | 0        | 0        | 1         | 1         |
| Carabidae sp 9                                            | ZO   | 1         | 0        | 0        | 0         | 1         |
| <i>Mimodromites nigrotestaceus</i> (Solier, 1849)         | ZO   | 0         | 0        | 0        | 3         | 3         |
| <b>Cerambycidae</b>                                       |      | <b>16</b> | <b>5</b> | <b>6</b> | <b>37</b> | <b>64</b> |
| <i>Acutandra araucana</i> (Bosq, 1951)                    | XL   | 1         | 0        | 3        | 6         | 10        |
| <i>Azygocera picturata</i> (Fairmaire et Germain, 1864)   | XL   | 0         | 0        | 0        | 1         | 1         |
| <i>Estola hirsutella</i> Aurivillius, 1922                | XL   | 0         | 2        | 0        | 0         | 2         |
| <i>Estola kuscheli</i> Barriga, Moore & Cepeda, 2005      | XL   | 1         | 0        | 0        | 0         | 1         |
| <i>Grammicosum flavofasciatum</i> Blanchard, 1843         | XL   | 3         | 0        | 2        | 0         | 5         |
| <i>Maripanus quadrimaculatus</i> (Germain, 1892)          | XL   | 0         | 0        | 0        | 2         | 2         |
| <i>Microplophorus calverti</i> Philippi, 1897             | XL   | 1         | 0        | 0        | 0         | 1         |
| <i>Microplophorus magellanicus</i> Blanchard, 1851        | XL   | 2         | 0        | 0        | 15        | 17        |
| <i>Phymatoderus bizonatus</i> Blanchard, 1843             | XL   | 3         | 0        | 0        | 0         | 3         |
| <i>Syllitus schajovskoi</i> Bosq, 1953                    | XL   | 5         | 3        | 1        | 13        | 22        |
| <b>Cerylonidae</b>                                        |      | <b>4</b>  | <b>3</b> | <b>5</b> | <b>4</b>  | <b>16</b> |
| <i>Philothermus major</i> Grouvelle, 1898                 | MC   | 4         | 3        | 5        | 4         | 16        |
| <b>Ciidae</b>                                             |      | <b>3</b>  | <b>0</b> | <b>1</b> | <b>3</b>  | <b>7</b>  |
| cf. <i>Cis</i> sp 1                                       | MC   | 2         | 0        | 0        | 2         | 4         |
| cf. <i>Cis</i> sp 2                                       | MC   | 1         | 0        | 1        | 0         | 2         |
| cf. <i>Cis</i> sp 3                                       | MC   | 0         | 0        | 0        | 1         | 1         |
| <b>Cleridae</b>                                           |      | <b>3</b>  | <b>0</b> | <b>0</b> | <b>7</b>  | <b>10</b> |
| <i>Eurymetopum</i> sp                                     | ZO   | 1         | 0        | 0        | 0         | 1         |
| <i>Eurymetopum modestum</i> (Philippi & Philippi 1864)    | ZO   | 1         | 0        | 0        | 1         | 2         |
| <i>Neogyponyx pallidus</i> Solervicens. 1976              | ZO   | 1         | 0        | 0        | 3         | 4         |

|                                                            |    |             |             |            |            |             |
|------------------------------------------------------------|----|-------------|-------------|------------|------------|-------------|
| <i>Oontelus</i> sp 1                                       | ZO | 0           | 0           | 0          | 1          | 1           |
| <i>Silviella acutipenne</i> (Spinola, 1849)                | ZO | 0           | 0           | 0          | 2          | 2           |
| <b>Corylophidae</b>                                        |    | <b>8</b>    | <b>2</b>    | <b>2</b>   | <b>7</b>   | <b>19</b>   |
| Corylophidae sp 1                                          | MC | 8           | 2           | 2          | 7          | 19          |
| <b>Cryptophagidae</b>                                      |    | <b>9</b>    | <b>4</b>    | <b>12</b>  | <b>5</b>   | <b>30</b>   |
| <i>Chiliosis</i> sp 1                                      | MC | 9           | 3           | 12         | 5          | 29          |
| <i>Chiliosis</i> sp 2                                      | MC | 0           | 1           | 0          | 0          | 1           |
| <b>Curculionidae</b>                                       |    | <b>1774</b> | <b>1830</b> | <b>221</b> | <b>345</b> | <b>4170</b> |
| <i>Acalles rotundatus</i> Blanchard, 1851                  | XL | 1           | 0           | 1          | 4          | 6           |
| <i>Acalles</i> sp 1                                        | XL | 1           | 0           | 0          | 1          | 2           |
| <i>Acalles varius</i> Gemminger, 1871                      | XL | 0           | 0           | 1          | 4          | 5           |
| <i>Anaballus cristatiger</i> Blanchard, 1851               | XL | 9           | 1           | 0          | 3          | 13          |
| <i>Araucarietius viridans</i> Kuschel, 1952                | XL | 1           | 0           | 0          | 0          | 1           |
| <i>Araucarius chilensis</i> Kuschel, 1966                  | XL | 2           | 1           | 2          | 0          | 5           |
| <i>Araucarius major</i> Kuschel, 1966                      | XL | 3           | 3           | 1          | 2          | 9           |
| <i>Araucarius minor</i> Kuschel, 1966                      | XL | 1390        | 1731        | 163        | 31         | 3315        |
| <i>Berberidicola carinatus</i> (Philippi & Philippi, 1864) | XL | 0           | 0           | 0          | 2          | 2           |
| <i>Calvertius tuberosus</i> (Fairmaire & Germain, 1860)    | XL | 0           | 3           | 1          | 0          | 4           |
| Curculionidae sp                                           | XL | 0           | 0           | 1          | 0          | 1           |
| Curculionidae sp 1                                         | XL | 0           | 0           | 0          | 1          | 1           |
| Curculionidae sp 2                                         | XL | 0           | 0           | 0          | 1          | 1           |
| Curculionidae sp 3                                         | XL | 0           | 0           | 0          | 1          | 1           |
| <i>Eisingius araucariae</i> Kuschel, 2001                  | XL | 0           | 0           | 0          | 4          | 4           |
| <i>Eisingius chusqueae</i> (Bondar, 1949)                  | XL | 0           | 0           | 0          | 1          | 1           |
| <i>Gnathotrupes</i> sp 1                                   | XL | 6           | 45          | 6          | 75         | 132         |
| <i>Gnathotrupes</i> sp 2                                   | XL | 0           | 0           | 0          | 1          | 1           |
| <i>Gnathotrupes velatus</i> Schedl, 1975                   | XL | 0           | 1           | 0          | 0          | 1           |
| <i>Hybreoleptops vestitus</i> (Blanchard, 1851)            | XL | 1           | 0           | 0          | 3          | 4           |
| <i>Hylaster</i> sp                                         | XL | 0           | 0           | 1          | 0          | 1           |
| <i>Hylurgonotus armaticeps</i> Schedl, 1955                | XL | 41          | 0           | 1          | 14         | 56          |
| <i>Hylurgonotus tuberculatus</i> (Eggers, 1942)            | XL | 96          | 16          | 38         | 15         | 165         |
| <i>Neopsilorhinus</i> sp                                   | XL | 3           | 0           | 1          | 4          | 8           |
| <i>Parergus axillaris</i> (Fairmaire & Germain, 1861)      | XL | 0           | 0           | 0          | 1          | 1           |
| <i>Rhopalomerus tenuirostris</i> Blanchard, 1851           | XL | 3           | 0           | 0          | 0          | 3           |
| <i>Rhyephenes humeralis</i> (Guérin-Ménéville, 1830)       | XL | 1           | 0           | 0          | 6          | 7           |
| <i>Rhyephenes maillei</i> (Gay & Solier, 1839)             | XL | 0           | 9           | 1          | 4          | 14          |
| <i>Sinophloeus antipodus</i> (Eggers, 1942)                | XL | 198         | 20          | 1          | 143        | 362         |
| <i>Xyleborinus saxeseni</i> (Ratzeburg, 1837)              | XL | 17          | 0           | 0          | 24         | 41          |
| <i>Xylechinosomus valdivianus</i> (Eggers, 1942)           | XL | 1           | 0           | 2          | 0          | 3           |
| <b>Dermestidae</b>                                         |    | <b>1</b>    | <b>0</b>    | <b>0</b>   | <b>1</b>   | <b>2</b>    |
| <i>Trogoderma</i> sp 1                                     | XL | 1           | 0           | 0          | 0          | 1           |
| <i>Trogoderma</i> sp 2                                     | XL | 0           | 0           | 0          | 1          | 1           |
| <b>Dryophthoridae</b>                                      |    | <b>2</b>    | <b>0</b>    | <b>0</b>   | <b>0</b>   | <b>2</b>    |
| <i>Dryophthorus canus</i> (Philippi & Philippi, 1864)      | XL | 2           | 0           | 0          | 0          | 2           |
| <b>Elateridae</b>                                          |    | <b>47</b>   | <b>1</b>    | <b>1</b>   | <b>36</b>  | <b>85</b>   |
| <i>Agriotes</i> sp                                         | ZO | 1           | 0           | 0          | 2          | 3           |
| <i>Anaspasis solieri</i> (Fleutiaux, 1899)                 | ZO | 0           | 0           | 0          | 13         | 13          |
| <i>Anaspasis</i> sp                                        | ZO | 0           | 0           | 0          | 1          | 1           |
| <i>Bedresia nigra</i> (Solier, 1851)                       | ZO | 3           | 1           | 1          | 6          | 11          |
| <i>Bedresia punctatosulcata</i> Solier, 1851               | ZO | 2           | 0           | 0          | 1          | 3           |
| cf. <i>Anaspasis</i> sp                                    | ZO | 0           | 0           | 0          | 1          | 1           |
| <i>Dilobitarsus sulcicollis</i> (Solier, 1851)             | ZO | 3           | 0           | 0          | 0          | 3           |
| Elateridae sp 1                                            | ZO | 0           | 0           | 0          | 1          | 1           |

|                                                           |    |            |           |           |            |             |
|-----------------------------------------------------------|----|------------|-----------|-----------|------------|-------------|
| Elateridae sp 2                                           | ZO | 2          | 0         | 0         | 0          | 2           |
| Elateridae sp 3                                           | ZO | 2          | 0         | 0         | 0          | 2           |
| <i>Hemicrepidius</i> cf. <i>philipii</i> Valencia, 1978   | ZO | 0          | 0         | 0         | 1          | 1           |
| <i>Pomachilico</i> sp                                     | ZO | 0          | 0         | 0         | 7          | 7           |
| <i>Semiotus luteipennis</i> Guérin-Méneville, 1838        | ZO | 3          | 0         | 0         | 1          | 4           |
| <i>Tibionema abdominalis</i> (Guérin-Méneville, 1838)     | ZO | 31         | 0         | 0         | 2          | 33          |
| <b>Erotylidae</b>                                         |    | <b>18</b>  | <b>0</b>  | <b>9</b>  | <b>9</b>   | <b>36</b>   |
| <i>Xalpiria elsa</i> Skelley & Cekalovic, 2001            | MC | 11         | 0         | 9         | 5          | 25          |
| <i>Xalpiria valdiviana</i> (Philippi & Philippi, 1864)    | MC | 7          | 0         | 0         | 4          | 11          |
| <b>Eucnemidae</b>                                         |    | <b>0</b>   | <b>1</b>  | <b>0</b>  | <b>0</b>   | <b>1</b>    |
| cf. <i>Xylophilus carinifrons</i> Cobos, 1968             | ZO | 0          | 1         | 0         | 0          | 1           |
| <b>Hobartiidae</b>                                        |    | <b>8</b>   | <b>0</b>  | <b>5</b>  | <b>60</b>  | <b>73</b>   |
| <i>Hobartius chilensis</i> Tomaszewska & Slipinski, 1995  | MC | 8          | 0         | 5         | 60         | 73          |
| <b>Lampyridae</b>                                         |    | <b>18</b>  | <b>1</b>  | <b>2</b>  | <b>72</b>  | <b>93</b>   |
| <i>Pyractonema bifenestrata</i> Fairmaire & Germain, 1862 | ZO | 1          | 0         | 0         | 0          | 1           |
| <i>Pyractonema haemorrhoea</i> Fairmaire & Germain, 1862  | ZO | 6          | 1         | 0         | 12         | 19          |
| <i>Pyractonema nigripennis</i> Solier, 1849               | ZO | 0          | 0         | 0         | 20         | 20          |
| <i>Pyractonema</i> sp 1                                   | ZO | 9          | 0         | 2         | 3          | 14          |
| <i>Pyractonema</i> sp 2                                   | ZO | 0          | 0         | 0         | 35         | 35          |
| <i>Pyractonema</i> sp 3                                   | ZO | 2          | 0         | 0         | 2          | 4           |
| <b>Latridiidae</b>                                        |    | <b>573</b> | <b>21</b> | <b>37</b> | <b>609</b> | <b>1240</b> |
| <i>Adistemia</i> sp                                       | MC | 0          | 2         | 0         | 9          | 11          |
| <i>Aridius nodifer</i> Westwood, 1839                     | MC | 1          | 0         | 2         | 3          | 6           |
| <i>Coninomus constrictus</i> Gyllenhal, 1827              | MC | 4          | 3         | 0         | 0          | 7           |
| Corticariinae sp 1                                        | MC | 6          | 0         | 0         | 18         | 24          |
| <i>Enicmus transversithorax</i> Dajoz, 1967               | MC | 557        | 15        | 35        | 578        | 1185        |
| Latridiidae sp 1                                          | MC | 1          | 0         | 0         | 0          | 1           |
| Latridiidae sp 2                                          | MC | 1          | 0         | 0         | 0          | 1           |
| <i>Melanophthalma seminigra</i> Belon, 1885               | MC | 1          | 0         | 0         | 0          | 1           |
| <i>Melanophthalma</i> sp 1                                | MC | 0          | 0         | 0         | 1          | 1           |
| <i>Melanophthalma</i> sp 2                                | MC | 1          | 1         | 0         | 0          | 2           |
| <b>Leiodidae</b>                                          |    | <b>36</b>  | <b>3</b>  | <b>10</b> | <b>96</b>  | <b>145</b>  |
| Leiodidae sp 1                                            | MC | 2          | 2         | 1         | 28         | 33          |
| Leiodidae sp 3                                            | MC | 0          | 0         | 1         | 0          | 1           |
| Leiodidae sp 4                                            | MC | 0          | 0         | 1         | 0          | 1           |
| Leiodidae sp 5                                            | MC | 1          | 0         | 0         | 0          | 1           |
| Leiodinae sp                                              | MC | 0          | 0         | 2         | 0          | 2           |
| <i>Metahydriobius</i> sp                                  | MC | 1          | 0         | 0         | 0          | 1           |
| <i>Nemadiopsis</i> sp                                     | MC | 14         | 0         | 0         | 16         | 30          |
| <i>Neohydriobius</i> sp                                   | MC | 0          | 0         | 4         | 0          | 4           |
| <i>Neopelatos edwardsi</i> Jeannel, 1936                  | MC | 17         | 1         | 1         | 47         | 66          |
| <i>Ragyttodes ocellifer</i> Jeannel, 1936                 | MC | 0          | 0         | 0         | 5          | 5           |
| <i>Ragyttodina tuberculosa</i> Jeannel, 1957              | MC | 1          | 0         | 0         | 0          | 1           |
| <b>Lucanidae</b>                                          |    | <b>7</b>   | <b>1</b>  | <b>6</b>  | <b>7</b>   | <b>21</b>   |
| <i>Erichius costatus</i> (Benesh, 1956)                   | XL | 0          | 1         | 0         | 0          | 1           |
| <i>Erichius calverti</i> (Nagel, 1932)                    | XL | 6          | 0         | 4         | 5          | 15          |
| <i>Erichius virgatus</i> (Nagel, 1928)                    | XL | 1          | 0         | 0         | 1          | 2           |
| <i>Hilophyllus martinezi</i> Paulse & Mondaca, 2006       | XL | 0          | 0         | 1         | 0          | 1           |
| <i>Pycnosiphorus lessonii mandibularis</i> (Solier, 1851) | XL | 0          | 0         | 0         | 1          | 1           |
| <i>Sclerostomulus tuberculatus</i> (Solier, 1851)         | XL | 0          | 0         | 1         | 0          | 1           |
| <b>Melandryidae</b>                                       |    | <b>0</b>   | <b>0</b>  | <b>0</b>  | <b>5</b>   | <b>5</b>    |
| <i>Mallochira</i> sp 1                                    | MC | 0          | 0         | 0         | 1          | 1           |
| <i>Mallochira</i> sp 2                                    | MC | 0          | 0         | 0         | 4          | 4           |

|                                                           |    |           |           |           |            |            |
|-----------------------------------------------------------|----|-----------|-----------|-----------|------------|------------|
| <b>Melyridae</b>                                          |    | <b>4</b>  | <b>0</b>  | <b>1</b>  | <b>3</b>   | <b>8</b>   |
| <i>Amecocerus</i> sp 1                                    | ZO | 0         | 0         | 0         | 0          | 0          |
| <i>Amecocerus</i> sp 2                                    | ZO | 0         | 0         | 0         | 0          | 0          |
| <i>Arthrobrachus quadriguttatus</i> Pic, 1919             | ZO | 1         | 0         | 0         | 0          | 1          |
| <i>Arthrobrachus rufitarsis</i> Philippi & Philippi, 1864 | ZO | 2         | 0         | 0         | 0          | 2          |
| <i>Hylodanacea binotata</i> (Solier, 1849)                | ZO | 1         | 0         | 1         | 0          | 2          |
| Melyridae sp 1                                            | ZO | 0         | 0         | 0         | 3          | 3          |
| <b>Monotomidae</b>                                        |    | <b>0</b>  | <b>0</b>  | <b>0</b>  | <b>2</b>   | <b>2</b>   |
| <i>Europs</i> sp                                          | ZO | 0         | 0         | 0         | 2          | 2          |
| <b>Mordellidae</b>                                        |    | <b>14</b> | <b>2</b>  | <b>10</b> | <b>15</b>  | <b>41</b>  |
| <i>Mordella holosericea</i> Solier, 1851                  | MC | 10        | 1         | 7         | 3          | 21         |
| <i>Mordella krausei</i> Philippi & Philippi, 1864         | MC | 0         | 0         | 1         | 1          | 2          |
| <i>Mordella rufoxillaris</i> Fairmaire & Germain, 1863    | MC | 3         | 1         | 0         | 1          | 5          |
| <i>Mordella</i> sp 1                                      | MC | 0         | 0         | 2         | 5          | 7          |
| Mordellidae sp                                            | MC | 1         | 0         | 0         | 5          | 6          |
| <b>Nitidulidae</b>                                        |    | <b>2</b>  | <b>0</b>  | <b>0</b>  | <b>16</b>  | <b>18</b>  |
| <i>Cnips</i> sp 1                                         | MC | 0         | 0         | 0         | 3          | 3          |
| <i>Cnips</i> sp 2                                         | MC | 0         | 0         | 0         | 1          | 1          |
| Nitidulidae sp 1                                          | MC | 1         | 0         | 0         | 0          | 1          |
| Nitidulidae sp 2                                          | MC | 1         | 0         | 0         | 0          | 1          |
| Nitidulidae sp 3                                          | MC | 0         | 0         | 0         | 1          | 1          |
| Nitidulidae sp 4                                          | MC | 0         | 0         | 0         | 7          | 7          |
| Nitidulidae sp 5                                          | MC | 0         | 0         | 0         | 1          | 1          |
| Nitidulidae sp 6                                          | MC | 0         | 0         | 0         | 1          | 1          |
| Nitidulidae sp 7                                          | MC | 0         | 0         | 0         | 2          | 2          |
| <b>Oedemeridae</b>                                        |    | <b>18</b> | <b>2</b>  | <b>0</b>  | <b>10</b>  | <b>30</b>  |
| <i>Mecopselaphus maculicollis</i> Solier, 1849            | XL | 0         | 0         | 0         | 4          | 4          |
| <i>Platylytra vitticollis</i> Fairmaire & Germain, 1863   | XL | 18        | 2         | 0         | 6          | 26         |
| <b>Phengodidae</b>                                        |    | <b>0</b>  | <b>0</b>  | <b>0</b>  | <b>1</b>   | <b>1</b>   |
| Phengodidae sp 1                                          | ZO | 0         | 0         | 0         | 1          | 1          |
| <b>Protocucujidae</b>                                     |    | <b>0</b>  | <b>0</b>  | <b>0</b>  | <b>4</b>   | <b>4</b>   |
| <i>Erichmodes</i> sp                                      | MC | 0         | 0         | 0         | 2          | 2          |
| Protocucujidae gen indet sp 1                             | MC | 0         | 0         | 0         | 2          | 2          |
| <b>Ptiliidae</b>                                          |    | <b>0</b>  | <b>73</b> | <b>0</b>  | <b>0</b>   | <b>73</b>  |
| <i>Smicrus</i> sp 1                                       | MC | 0         | 73        | 0         | 0          | 73         |
| <b>Ptinidae</b>                                           |    | <b>46</b> | <b>2</b>  | <b>21</b> | <b>291</b> | <b>360</b> |
| <i>Anobium punctatum</i> (DeGeer, 1774)                   | XL | 2         | 0         | 2         | 15         | 19         |
| <i>Byrrhodes bimaculatus</i> (Philippi, 1864)             | XL | 7         | 2         | 10        | 11         | 30         |
| <i>Caenocara nigrum</i> (Philippi, 1864)                  | XL | 34        | 0         | 1         | 236        | 271        |
| <i>Calymmaderus annuus</i> Pic, 1923                      | XL | 0         | 0         | 0         | 1          | 1          |
| <i>Calymmaderus subexplanatus</i> Pic, 1923               | XL | 0         | 0         | 0         | 1          | 1          |
| <i>Hemicoelinum raventosi</i> Español, 1971               | XL | 1         | 0         | 0         | 3          | 4          |
| <i>Stichtoptychus granulatus</i> (Pic, 1923)              | XL | 2         | 0         | 8         | 21         | 31         |
| <i>Stichtoptychus</i> sp 1                                | XL | 0         | 0         | 0         | 3          | 3          |
| <b>Pyrochroidae</b>                                       |    | <b>0</b>  | <b>0</b>  | <b>0</b>  | <b>5</b>   | <b>5</b>   |
| <i>Cycloderes signaticollis</i> Fairmaire & Germain, 1861 | XL | 0         | 0         | 0         | 5          | 5          |
| <b>Salpingidae</b>                                        |    | <b>5</b>  | <b>4</b>  | <b>4</b>  | <b>17</b>  | <b>30</b>  |
| <i>Lissodema glaberrima</i> Fairmaire & Germain, 1863     | MC | 1         | 0         | 0         | 0          | 1          |
| Salpingidae sp 1                                          | MC | 0         | 2         | 3         | 0          | 5          |
| Salpingidae sp 2                                          | MC | 0         | 1         | 0         | 0          | 1          |
| <i>Vincenzellus</i> sp                                    | MC | 0         | 1         | 0         | 0          | 1          |
| <i>Vincenzellus frigidus</i> (Fairmaire & Germain, 1863)  | MC | 0         | 0         | 1         | 0          | 1          |
| <i>Vincenzellus</i> sp 2                                  | MC | 0         | 0         | 0         | 5          | 5          |

|                                                            |    |            |            |            |            |            |
|------------------------------------------------------------|----|------------|------------|------------|------------|------------|
| <i>Vincenzellus variegatus</i> (Fairmaire & Germain, 1861) | MC | 4          | 0          | 0          | 12         | 16         |
| <b>Scarabaeidae</b>                                        |    | <b>116</b> | <b>4</b>   | <b>4</b>   | <b>60</b>  | <b>184</b> |
| <i>Oryctomorphus bimaculatus</i> Guérin-Méneville, 1830    | XL | 1          | 4          | 0          | 1          | 6          |
| Scarabaeidae sp 1                                          | XL | 0          | 0          | 0          | 1          | 1          |
| Scarabaeidae sp 2                                          | XL | 4          | 0          | 0          | 0          | 4          |
| Scarabaeidae sp 3                                          | XL | 0          | 0          | 0          | 1          | 1          |
| Scarabaeidae sp 4                                          | XL | 5          | 0          | 0          | 10         | 15         |
| Scarabaeidae sp 5                                          | XL | 18         | 0          | 0          | 4          | 22         |
| Scarabaeidae sp7                                           | XL | 5          | 0          | 0          | 0          | 5          |
| Scarabaeidae sp8                                           | XL | 1          | 0          | 0          | 0          | 1          |
| <i>Sirecoides</i> sp 1                                     | XL | 16         | 0          | 0          | 1          | 17         |
| <i>Sirecoides</i> sp 2                                     | XL | 6          | 0          | 1          | 4          | 11         |
| <i>Sirecoides veridis</i> (Solier, 1851)                   | XL | 60         | 0          | 3          | 38         | 101        |
| <b>Scirtidae</b>                                           |    | <b>4</b>   | <b>1</b>   | <b>1</b>   | <b>9</b>   | <b>15</b>  |
| <i>Cyphon lunatum</i> Solier, 1849                         | XL | 2          | 0          | 1          | 0          | 3          |
| <i>Cyphon</i> sp 1                                         | XL | 1          | 1          | 0          | 1          | 3          |
| <i>Cyphon</i> sp 2                                         | XL | 1          | 0          | 0          | 0          | 1          |
| <i>Cyphon</i> sp 3                                         | XL | 0          | 0          | 0          | 1          | 1          |
| <i>Elodes</i> sp                                           | XL | 0          | 0          | 0          | 4          | 4          |
| Scirtidae sp 1                                             | XL | 0          | 0          | 0          | 1          | 1          |
| Scirtidae sp 2                                             | XL | 0          | 0          | 0          | 1          | 1          |
| Scirtidae sp 3                                             | XL | 0          | 0          | 0          | 1          | 1          |
| <b>Scraptiidae</b>                                         |    | <b>1</b>   | <b>0</b>   | <b>0</b>   | <b>2</b>   | <b>3</b>   |
| <i>Nemacerus</i> sp                                        | ZO | 1          | 0          | 0          | 0          | 1          |
| <i>Scraptia</i> sp                                         | ZO | 0          | 0          | 0          | 2          | 2          |
| <b>Sphindidae</b>                                          |    | <b>67</b>  | <b>3</b>   | <b>4</b>   | <b>33</b>  | <b>107</b> |
| <i>Protosphindus chilensis</i> Sen Gupta & Crowson, 1979   | MC | 67         | 3          | 4          | 33         | 107        |
| <b>Staphylinidae</b>                                       |    | <b>227</b> | <b>304</b> | <b>129</b> | <b>186</b> | <b>846</b> |
| <i>Achilia antennalis</i> Jeannel, 1962                    | ZO | 2          | 0          | 0          | 2          | 4          |
| <i>Achilia excisa</i> (Schaufuss, 1880)                    | ZO | 3          | 1          | 1          | 23         | 28         |
| <i>Achilia fiura</i> Kurbatov, Cuccodoro & Sabella, 2018   | ZO | 0          | 0          | 0          | 6          | 6          |
| <i>Achilia</i> sp 1                                        | ZO | 8          | 3          | 0          | 5          | 16         |
| <i>Achilia</i> sp 2                                        | ZO | 1          | 0          | 0          | 0          | 1          |
| <i>Aleocara</i> sp                                         | ZO | 1          | 0          | 0          | 0          | 1          |
| <i>Alloproteinus nigriceps</i> (Fauvel, 1867)              | ZO | 1          | 0          | 0          | 0          | 1          |
| <i>Atheta</i> sp                                           | ZO | 0          | 1          | 1          | 0          | 2          |
| <i>Blepharhymenus</i> sp                                   | ZO | 0          | 1          | 0          | 1          | 2          |
| <i>Glypholoma pecki</i> Thayer & Newton, 1979              | ZO | 1          | 0          | 0          | 0          | 1          |
| <i>Glypholoma pustuliferum</i> Jeannel, 1962               | ZO | 152        | 44         | 15         | 74         | 285        |
| <i>Hamotus</i> sp                                          | ZO | 2          | 0          | 0          | 0          | 2          |
| <i>Ischnothina newtoni</i> Pace, 1999                      | ZO | 11         | 0          | 0          | 3          | 14         |
| Leptotyphlinae sp                                          | ZO | 0          | 0          | 10         | 0          | 10         |
| <i>Microsilpha ocelligera</i> (Champion, 1918)             | ZO | 0          | 2          | 78         | 0          | 80         |
| <i>Microsilpha</i> sp 2                                    | ZO | 0          | 0          | 1          | 0          | 1          |
| <i>Neopeltops edwardsi</i> Jeannel 1936                    | ZO | 0          | 0          | 0          | 19         | 19         |
| <i>Omalopsis russata</i> (Fairm. & Germ., 1861)            | ZO | 0          | 15         | 2          | 3          | 20         |
| <i>Omalopsis</i> sp 1                                      | ZO | 3          | 8          | 1          | 2          | 14         |
| Oxypodini gen sp 1                                         | ZO | 0          | 1          | 0          | 0          | 1          |
| Oxypodini gen sp 2                                         | ZO | 1          | 1          | 0          | 0          | 2          |
| Oxytelinae gen sp 1                                        | ZO | 5          | 0          | 0          | 0          | 5          |
| <i>Pagla apicalis</i> (Fauvel, 1866)                       | ZO | 3          | 26         | 1          | 0          | 30         |
| <i>Pagla</i> sp 1                                          | ZO | 0          | 54         | 13         | 4          | 71         |
| <i>Pagla vogeli</i> Pace, 1988                             | ZO | 1          | 0          | 1          | 11         | 13         |

|                                                             |    |             |             |            |             |             |
|-------------------------------------------------------------|----|-------------|-------------|------------|-------------|-------------|
| <i>Parapteracmes</i> sp 1                                   | ZO | 7           | 3           | 0          | 6           | 16          |
| <i>Phloeopora newtoni</i> (Pace, 1999)                      | ZO | 1           | 0           | 0          | 0           | 1           |
| Pselaphinae sp 2                                            | ZO | 0           | 0           | 0          | 1           | 1           |
| Pselaphinae sp 3                                            | ZO | 0           | 0           | 1          | 0           | 1           |
| Pselaphinae sp 4                                            | ZO | 1           | 0           | 0          | 0           | 1           |
| <i>Salagosa</i> sp 1                                        | ZO | 0           | 1           | 0          | 1           | 2           |
| <i>Scydmaenus flaveolus</i> (Schaufuss, 1866)               | ZO | 6           | 3           | 0          | 5           | 14          |
| Staphylinidae sp 2                                          | ZO | 5           | 0           | 0          | 0           | 5           |
| Staphylinidae sp 3                                          | ZO | 2           | 0           | 0          | 0           | 2           |
| Staphylinidae sp 4                                          | ZO | 0           | 117         | 3          | 2           | 122         |
| Staphylinidae sp 5                                          | ZO | 1           | 0           | 0          | 0           | 1           |
| Staphylinidae sp 6                                          | ZO | 1           | 21          | 0          | 1           | 23          |
| Staphylinidae sp 7                                          | ZO | 2           | 0           | 0          | 0           | 2           |
| Staphylinidae sp 8                                          | ZO | 1           | 0           | 0          | 0           | 1           |
| Staphylinidae sp 9                                          | ZO | 0           | 0           | 1          | 0           | 1           |
| Tachyporinae gen sp 1                                       | ZO | 2           | 0           | 0          | 7           | 9           |
| Tachyporinae gen sp 2                                       | ZO | 0           | 0           | 0          | 3           | 3           |
| <i>Tyropsis</i> sp                                          | ZO | 2           | 0           | 0          | 1           | 3           |
| <b>Tenebrionidae</b>                                        |    | <b>3</b>    | <b>0</b>    | <b>2</b>   | <b>0</b>    | <b>5</b>    |
| <i>Heliofugus</i> sp                                        | XL | 1           | 0           | 0          | 0           | 1           |
| Tenebrionidae sp 1                                          | XL | 2           | 0           | 2          | 0           | 4           |
| <b>Trogossitidae</b>                                        |    | <b>0</b>    | <b>0</b>    | <b>0</b>   | <b>7</b>    | <b>7</b>    |
| <i>Acalanthis mirabilis</i> Reitter, 1876                   | ZO | 0           | 0           | 0          | 2           | 2           |
| <i>Acalanthis quadrisignata</i> Erichson, 1842              | ZO | 0           | 0           | 0          | 1           | 1           |
| <i>Rentonium chilense</i> Crowson, 1970                     | ZO | 0           | 0           | 0          | 4           | 4           |
| <b>Zopheridae</b>                                           |    | <b>4</b>    | <b>38</b>   | <b>5</b>   | <b>14</b>   | <b>61</b>   |
| <i>Bitoma</i> sp                                            | MC | 0           | 0           | 0          | 1           | 1           |
| <i>Lasconotus chilensis</i> (Grouvelle, 1898)               | MC | 0           | 2           | 4          | 7           | 13          |
| <i>Notorthocerus valdivianus</i> Slipinski & Lawrence, 1999 | MC | 2           | 0           | 0          | 0           | 2           |
| <i>Pristoderus flexuosus</i> (Solier, 1851)                 | MC | 1           | 0           | 0          | 1           | 2           |
| <i>Pristoderus regularis</i> (Kulzer, 1966)                 | MC | 0           | 0           | 0          | 1           | 1           |
| <i>Synchita</i> sp 1                                        | MC | 1           | 34          | 1          | 4           | 40          |
| <i>Synchita</i> sp 2                                        | MC | 0           | 2           | 0          | 0           | 2           |
| <b>Total general</b>                                        |    | <b>3093</b> | <b>2309</b> | <b>505</b> | <b>2050</b> | <b>7957</b> |
