# Supplementary material for: Short-Interval, Severe Wildfires Alter Saproxylic Beetle Diversity in Andean Araucaria Forests in Northwest Chilean Patagonia
Source: MDPI journal article supplement (doi:10.3390/f13030441), 2022-03-11

**Supplementary Material S1.** Biomass ( $\text{m}^3 \text{ha}^{-1}$ ) registered in the studied areas based on the living and dead trees in a gradient of fire conditions for *Araucaria araucana* trees (upper) and *Nothofagus*-types trees (bottom). Fire conditions are: 2002 burned areas (2002); 2015 burned areas (2015); short-interval severe burned areas (i.e. 2002 and 2015 fires, SISF), and unburned areas in Northwest Patagonian *Araucaria*-*Nothofagus* Chilean forests. Bars represent the summary of 6 sampling units ( $0.05 \text{ha}^{-1}$  each one) per site condition. In each sampling plot both stand and logs of dead wood were registered.

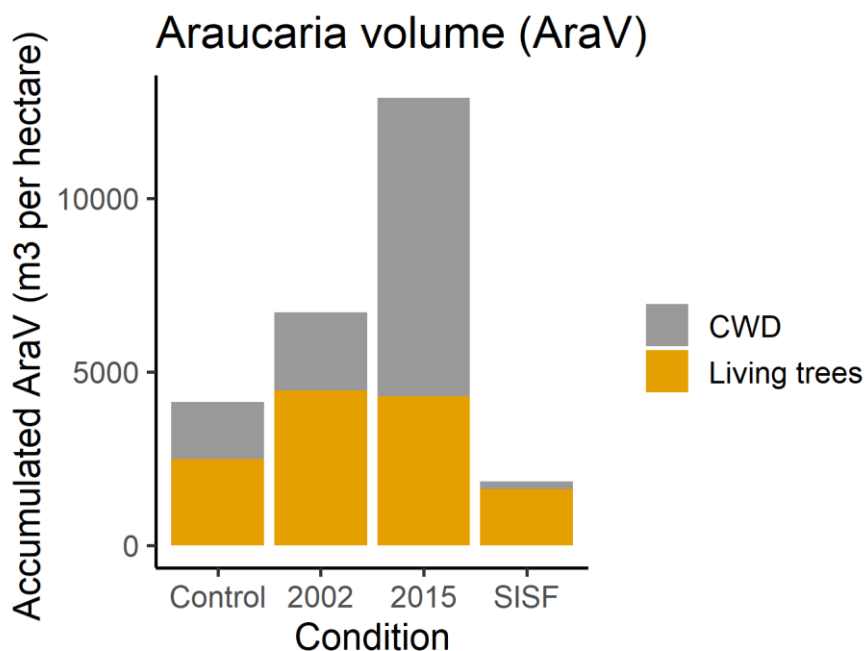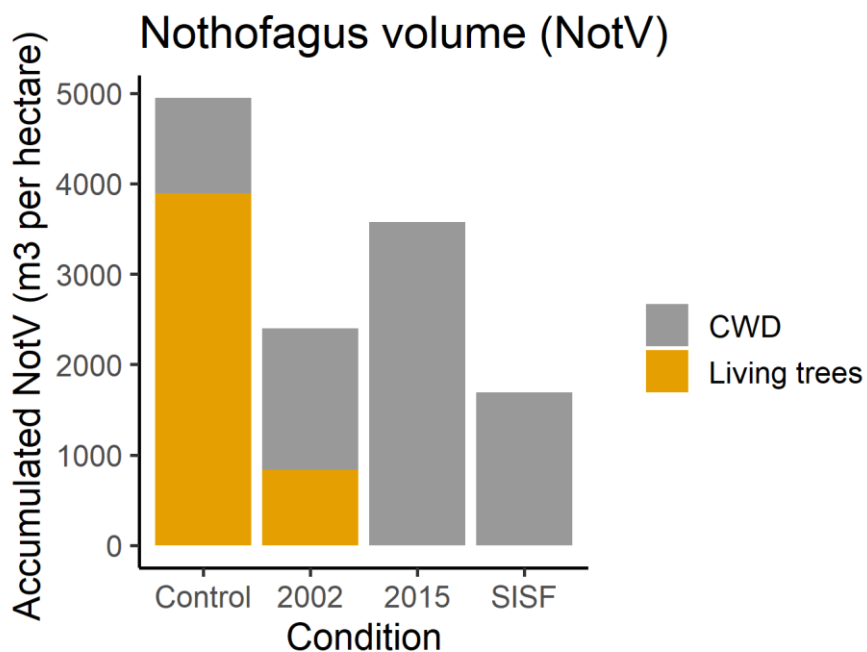

Supplement: s1 [file s1]
